# Supplementary material for: Microscale Constructed Wetlands with Different Particulate Matters in their Substrates Exhibit Opposite Nitrogen Removal Performances
Source: MDPI journal article supplement (doi:10.3390/w15030434), 2023-01-20
Supplement: s1 [file s1]

Archive with 1 entries (1 files):
- water-2106714-supplementary.pdf
