# Supplementary material for: Microscale Constructed Wetlands with Different Particulate Matters in their Substrates Exhibit Opposite Nitrogen Removal Performances
Source: MDPI journal article supplement (doi:10.3390/w15030434), 2023-01-20
Supplement: s1 [file s1 › water-2106714-supplementary.pdf]

# **Supplementary Materials**

## **Microscale Constructed Wetlands with Different Particulate Matters in their Substrates Exhibit Opposite Nitrogen Removal Performances**

**Lele Cui <sup>1</sup>, Huijun Xie <sup>1</sup>, Shiwen Zhang <sup>1</sup>, Zhen Hu <sup>2</sup>, Shuang Liang <sup>2,\*</sup> and Jian Zhang <sup>2,3</sup>**

<sup>1</sup> Environmental Research Institute, Shandong University, Binhai Road 72, Qingdao 266237, China

<sup>2</sup> Shandong Provincial Key Laboratory of Water Pollution Control and Resource Reuse, Shandong Key Laboratory of Environmental Processes and Health, School of Environmental Science and Engineering, Shandong University, Qingdao 266237, China

<sup>3</sup> College of Safety and Environmental Engineering, Shandong University of Science and Technology, Qingdao 266590, China

\* Correspondence: liangshuang@sdu.edu.cn

## Contents

### Text S1 Measurements of the key enzymes activities of N-transformation

The activity of AMO was determined by the oxidation of  $\text{NH}_4^+\text{-N}$  to  $\text{NO}_2^-\text{-N}$ , and the activity of NXR was determined by the oxidation of  $\text{NO}_2^-\text{-N}$  to  $\text{NO}_3^-\text{-N}$ . Specifically, 1 g sand sample was added to the CW into a 50 mL centrifuge tube containing 5 mL mixture 0.01 M PBS (containing 1 mM  $(\text{NH}_4)_2\text{SO}_4$  and 10 mM  $\text{KClO}_3$ , pH = 7.4) for the determination of AMO activity. 5 mL mixture 0.01 M PBS (containing 1 mM  $\text{NaNO}_2$ , pH = 7.4) was used to determine NXR activity. NAR activity was measured by reducing  $\text{NO}_3^-\text{-N}$  to  $\text{NO}_2^-\text{-N}$  under anaerobic conditions, and NIR activity was measured by reducing  $\text{NO}_2^-\text{-N}$  to NO under anaerobic conditions. Specifically, the activity of NAR was determined by adding 1 g of sand sample into 10 mL mixed solution containing 5 mL and 0.01 M PBS (containing 2 mM  $\text{KNO}_3$ , 15 mM  $\text{C}_6\text{H}_{12}\text{O}_6$ , pH = 7.4) anaerobic tube. NIR activity was determined with 5 mL mixed solution 0.01 M PBS (containing 2 mM  $\text{NaNO}_2$ , 15 mM  $\text{C}_6\text{H}_{12}\text{O}_6$ , pH = 7.4).

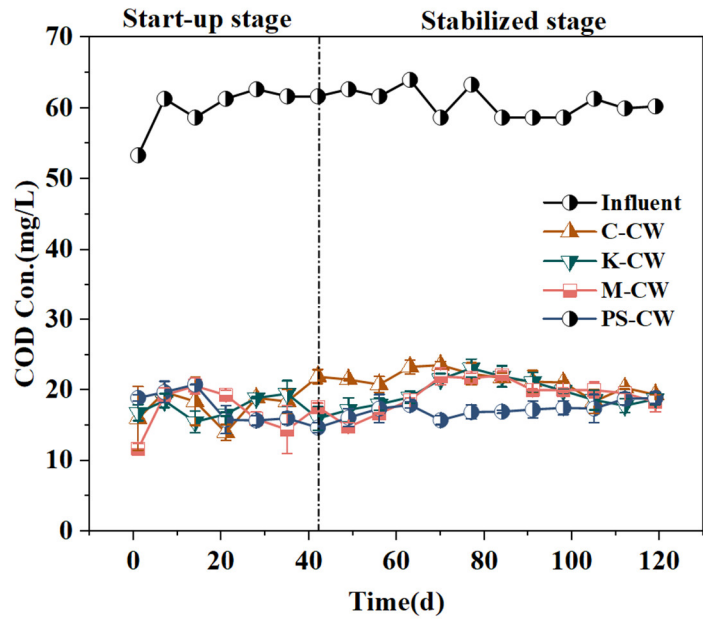

**Figure S1.** The carbon source consumption, represented by the difference of COD concentrations in influent and effluent in C-CW, K-CW, M-CW and PS-CW.
